# Supplementary material for: Comparison of VLT/X-shooter OH and O 2 rotational temperatures with consideration of TIMED/SABER emission and temperature profiles
Source: Copernicus journal article supplement (doi:10.5194/acp-16-5021-2016), 2016-04-22
Supplement: Supplementary file 1 [file acp-16-5021-2016-supplement.zip]

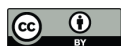

## *Supplement of*

# **Comparison of VLT/X-shooter OH and O<sub>2</sub> rotational temperatures with consideration of TIMED/SABER emission and temperature profiles**

**Stefan Noll et al.**

*Correspondence to:* S. Noll (stefan.noll@uibk.ac.at)

- acp-16-5021-2016-supplement-title-page.pdf
- f04.dat
- f06.dat
- f08.dat
- f09.dat
- f10.dat
- f11.dat
- f12.dat
- f13.dat
- f14.dat
- f15.dat
- f16.dat
- f17a.dat
- f17b.dat
- f18.dat

The copyright of individual parts of the supplement might differ from the CC-BY 3.0 licence.
